# Supplementary material for: Taurine pangenome uncovers a segmental duplication upstream of KIT associated with depigmentation in white-headed cattle
Source: HighWire-hosted journal article supplement (doi:10.1101/gr.279064.124), 2024-12-18
Supplement: Supplemental_Code.docx [file Supplemental_Code.docx]

**GitHub repository** https://github.com/AnimalGenomicsETH/pangenome_KIT

**
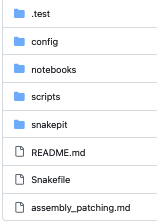
**

**Snakefile**

## split out our samples into local and downloaded

local_samples, SRA_samples = [], {}

with open(config['samples'],'r') as fin:

for line in fin:

name, ID, *_ = line.split()

if ID == 'local':

local_samples.append(name)

elif name[0] == '#':

continue

else:

SRA_samples[name] = ID

samples = local_samples + list(SRA_samples.keys())

workflow._singularity_args = f'-B $TMPDIR'

include: 'snakepit/public_downloading.smk'

include: 'snakepit/pangenome_construction.smk'

include: 'snakepit/pangenome_analysis.smk'

include: 'snakepit/pangenome_alignment.smk'

include: 'snakepit/PCA.smk'

def make_targets():

targets = []

for graph, config_items in config['graphs'].items():

for reference in config['references'].keys():

targets.append(f'{graph}/node_coverage.{reference}.csv.gz')

targets.append(f'sample_information.{reference}.csv')

targets.append(f'PCA/control.eigenvec')

for graph, config_items in config['gggenes'].items():

targets.append(f'gggenes/{graph}.repeats.tsv')

return targets

rule all:

input:

make_targets()

**notebooks:**

**Jaccard.ipynb**

{

"cells": [

{

"cell_type": "code",

"execution_count": null,

"id": "7e928768-ea9e-46de-aead-8d336aa8b3a7",

"metadata": {},

"outputs": [],

"source": [

"%matplotlib widget\n",

"import polars as pl\n",

"import matplotlib.pyplot as plt\n",

"from qmplot import manhattanplot"

]

},

{

"cell_type": "code",

"execution_count": null,

"id": "44988977-8133-4d4e-94cf-849a6e3a0b26",

"metadata": {},

"outputs": [],

"source": [

"def load_all_jaccard(chromosomes,min_paths=153):\n",

" return pl.concat([pl.read_csv(f'Jaccard/{c}.summary.1000.jaccard.csv') for c in chromosomes])\n",

"df = load_all_jaccard(range(1,30))"

]

},

{

"cell_type": "code",

"execution_count": null,

"id": "4c112faa-e371-418e-b1da-fdde6499aef2",

"metadata": {

"scrolled": true

},

"outputs": [],

"source": [

"xticks = list(map(str,range(1,10))) + list(map(str,range(10,30,2)))\n",

"fancy_ratio = r\"$\\frac{\\langle J_{i = j} \\rangle}{\\langle J_{i \\neq j} \\rangle}$\"\n",

"\n",

"f, ax = plt.subplots(figsize=(7,2.75),layout=\"constrained\")\n",

"axin1 = ax.inset_axes([0.6, 0.5, 0.35, 0.35])\n",

"\n",

"manhattanplot(data=df.filter(pl.col('count')<400).filter(pl.col('count')>200).sort(['Chromosome','Start']).to_pandas(),\n",

" chrom='Chromosome',pos='Start',pv='Jaccard similarity ratio',ylabel='Jaccard similarity ratio',\n",

" logp=False,rasterized=True,sign_marker_p=5,xtick_label_set=xticks,\n",

" suggestiveline=None,genomewideline=5,\n",

" sign_line_cols=[\"#37323E\", \"#37323E\"],hline_kws={'ls':'--'},\n",

" sign_marker_color='#E90D13',color=\"#B8B8B8,#0DE9E3\",\n",

" ax=ax)\n",

"\n",

"manhattanplot(data=df.filter((pl.col('Chromosome')==6)&(pl.col('Start')>70040000)&(pl.col('Start')<70130000)).sort(['Chromosome','Start']).to_pandas(),\n",

" chrom='Chromosome',pos='Start',pv='Jaccard similarity ratio',ylabel='',\n",

" logp=False,rasterized=True,sign_marker_p=5,xtick_label_set=xticks,\n",

" suggestiveline=None,genomewideline=5,\n",

" sign_line_cols=[\"#37323E\", \"#37323E\"],hline_kws={'ls':'--'},\n",

" sign_marker_color='#E90D13',color=\"#0DE9E3,#B8B8B8\",ax=axin1)\n",

"axin1.set_xlim(70040000, 70130000)\n",

"axin1.set_xlabel('')"

]

},

{

"cell_type": "code",

"execution_count": null,

"id": "f6ed7411-21ff-467d-81d8-453622dc0143",

"metadata": {},

"outputs": [],

"source": [

"plt.savefig('Figures/Jaccard.svg',dpi=500)"

]

}

],

"metadata": {

"kernelspec": {

"display_name": "Python 3 (ipykernel)",

"language": "python",

"name": "python3"

},

"language_info": {

"codemirror_mode": {

"name": "ipython",

"version": 3

},

"file_extension": ".py",

"mimetype": "text/x-python",

"name": "python",

"nbconvert_exporter": "python",

"pygments_lexer": "ipython3",

"version": "3.11.6"

}

},

"nbformat": 4,

"nbformat_minor": 5

}

**KIT_coverage.ipynb**

{

"cells": [

{

"cell_type": "code",

"execution_count": null,

"id": "e3541fed-4b31-4a30-87b4-6f0bb10ac150",

"metadata": {},

"outputs": [],

"source": [

"%matplotlib widget\n",

"import pandas as pd\n",

"import polars as pl\n",

"import numpy as np\n",

"\n",

"import seaborn as sns\n",

"import matplotlib.pyplot as plt\n",

"import matplotlib.colors as colors\n",

"\n",

"from scipy.stats.mstats import kruskalwallis, mannwhitneyu\n",

"import scikit_posthocs"

]

},

{

"cell_type": "code",

"execution_count": null,

"id": "54e99c34-918b-47a8-89a3-6c3320edf0ed",

"metadata": {},

"outputs": [],

"source": [

"white_headed_breeds = ['cross','MON','NMD','SIM','FV','HER','GWH','YAR'] + ['cSIM','SxH','FLK','VWD','HWD','sHER','KWH']\n",

"info = pl.read_csv('sample_information.csv',separator=' ')\n",

"nodes = pl.read_csv('subgraph.nodes.csv',separator=' ')\n",

"KIT_nodes = [int(i) for i in open('KIT_nodes')]\n",

"coverage = (pl.read_csv('node_coverage.csv.gz',separator=' ')\n",

" .join(info,on='sample')\n",

" .join(nodes,on='node')\n",

" .with_columns([pl.col('breed').is_in(white_headed_breeds).alias('White-headed'),pl.col('node').is_in(KIT_nodes).alias('KIT'),(pl.col('coverage')*pl.col('length')).alias('total coverage')])\n",

" )\n",

"x_order = [i for i in coverage['breed'].unique() if i not in white_headed_breeds] + white_headed_breeds"

]

},

{

"cell_type": "code",

"execution_count": null,

"id": "766fc527-7320-4b15-9515-06b7fa91c3d2",

"metadata": {},

"outputs": [],

"source": [

"averages_r = (coverage.filter((pl.col('length')>=0)&(pl.col('coverage')>=0))\n",

" .group_by('sample','breed','KIT','coverage_right','duplication_rate')\n",

" .agg(pl.col('total coverage').sum())\n",

" .with_columns([(pl.col('total coverage')/(pl.col('coverage_right')*(1-pl.col('duplication_rate')))).alias('adjusted coverage')])\n",

" .with_columns([(pl.col('adjusted coverage')/((14325*pl.col('KIT') + 2e6*(~pl.col('KIT'))))).alias('Length normalised coverage')])\n",

" )\n",

"averages = averages_r.to_pandas()\n",

"\n",

"g = sns.catplot(data=averages,x='breed',y='Length normalised coverage',hue='breed',col='KIT',order=x_order)\n",

"g.map(sns.boxplot,'breed','Length normalised coverage',order=x_order,**{'boxprops':{'facecolor':'none'}})\n",

"g.set_xticklabels(rotation=45,ha='center')\n",

"for ax in g.axes_dict.values():\n",

" ax.axline((0,1), slope=0, c=\".2\", ls=\"--\", zorder=0)"

]

},

{

"cell_type": "code",

"execution_count": null,

"id": "e490da5f-f027-4007-a18c-7ff57350c81f",

"metadata": {},

"outputs": [],

"source": [

"p_matrix = scikit_posthocs.posthoc_mannwhitney(averages_r.filter(pl.col('KIT')).to_pandas(),'Length normalised coverage','breed',p_adjust='bonferroni')\n",

"plt.figure()\n",

"scikit_posthocs.sign_plot(p_matrix[x_order].reindex(index = x_order).to_numpy())\n",

"\n",

"f, ax = plt.subplots()\n",

"\n",

"p = ax.pcolormesh(p_matrix[x_order].reindex(index = x_order).to_numpy(),norm=colors.LogNorm(vmin=1e-10, vmax=1))\n",

"f.colorbar(p)\n",

"ax.set_yticks(np.arange(len(p_matrix.index))+0.5)\n",

"ax.set_yticklabels(p_matrix.index)\n",

"\n",

"ax.set_xticks(np.arange(len(p_matrix.columns))+0.5)\n",

"\n",

"ax.set_xticklabels(p_matrix.columns,rotation=45,ha='center')\n",

"\n",

"plt.show()"

]

},

{

"cell_type": "code",

"execution_count": null,

"id": "7ca9722d-ce84-4e5e-a1ae-35ce996c4643",

"metadata": {},

"outputs": [],

"source": [

"def map_rolling(data,x,y,color,**kws):\n",

" ax = plt.gca()\n",

" ax.plot(data[x],data[y].rolling(10).mean(),color=color)\n",

"\n",

"def label(x, color, label):\n",

" ax = plt.gca() #get current axis\n",

" ax.text(-.1, .4, label, color='black', fontsize=13,\n",

" ha=\"left\", va=\"center\", transform=ax.transAxes)"

]

},

{

"cell_type": "code",

"execution_count": null,

"id": "22a14c44-5aa7-4014-9e17-659962e82814",

"metadata": {},

"outputs": [],

"source": [

"## rolling node plot\n",

"\n",

"means = (coverage.filter((pl.col('KIT'))&(pl.col('length')>=0)&(pl.col('coverage')>=0))\n",

" .with_columns([(pl.col('coverage')/((pl.col('coverage_right')*(1-pl.col('duplication_rate'))))).alias('adjusted coverage')])\n",

" .group_by('breed','node')\n",

" .agg(pl.col('adjusted coverage').median(),pl.col('length').median())\n",

" .sort(by='node')\n",

" ).to_pandas()\n",

"\n",

"g = sns.FacetGrid(means, hue='breed',height=.75,aspect=10,row=\"breed\",row_order=x_order)\n",

"g.map_dataframe(map_rolling,x='node',y='adjusted coverage')\n",

"#g.refline(y=0, linewidth=0.5, linestyle=\"-\", color=None, clip_on=False)\n",

"g.figure.subplots_adjust(hspace=-5.75)\n",

"g.set_titles(\"\")\n",

"g.map(label, \"breed\")\n",

"g.set(yticks=[], ylabel=\"\")\n",

"g.despine(bottom=False, left=True)"

]

},

{

"cell_type": "code",

"execution_count": null,

"id": "112d0c37-fadd-47b2-a7b6-f4c3a6599d9c",

"metadata": {},

"outputs": [],

"source": [

"### Sample outlier detection\n",

"\n",

"## Weird FV sample\n",

"print(averages[(averages['coverage']>0.90)&(averages['KIT']==False)&(averages['breed']=='FV')])\n",

"\n",

"\n",

"## removing bad CHI/CHA samples with large insert sizes and stddev\n",

"bad_inserts = ['UMCUSAU000000194426','UMCUSAU000000194423','UMCUSAU000000194424','UMCUSAU000000194748','UMCUSAU000000194761','UMCUSAU000000194425','UMCUSAU000000194370']\n",

"print(averages[(averages['coverage']<0.25)&(averages['KIT']==False)&(averages['sample'].isin(bad_inserts))])\n",

"\n",

"\n",

"## Potentially a mislabelling for SAMEA7690196\n",

"print(averages[(averages['coverage']>0.60)&(averages['KIT']==True)&(averages['breed']=='CHI')])\n",

"\n",

"## same as first weird FV sample\n",

"print(averages[(averages['coverage']>1.60)&(averages['KIT']==True)&(averages['breed']=='FV')])\n",

"\n",

"print(averages[(averages['coverage']>2.00)&(averages['KIT']==True)&(averages['breed']=='SIM')])\n",

"\n",

"print(averages[(averages['coverage']<.20)&(averages['KIT']==True)&(averages['breed']=='NMD')])\n",

"\n",

"print(averages[(averages['coverage']>4.5)&(averages['KIT']==True)&(averages['breed']=='HER')])"

]

},

{

"cell_type": "code",

"execution_count": null,

"id": "483dc91c-e3f9-47a7-8ad5-f641756392c8",

"metadata": {},

"outputs": [],

"source": [

"## DEAD CODE\n",

"averages = coverage.filter((pl.col('length')>=0)&(pl.col('coverage')>=0)).group_by('sample','breed','KIT','coverage_right','duplication_rate').agg(pl.col('coverage').mean()).to_pandas()\n",

"averages['coverage']/=(averages['coverage_right']*(1-averages['duplication_rate']))\n",

"g = sns.catplot(data=averages,x='breed',y='coverage',hue='breed',col='KIT',order=x_order)\n",

"g.map(sns.boxplot,'breed','coverage',order=x_order,**{'boxprops':{'facecolor':'none'}})\n",

"g.set_xticklabels(rotation=45,ha='center')\n",

"\n",

"\n",

"averages = coverage.group_by('node','breed','KIT','coverage_right','duplication_rate').agg(pl.col('coverage').mean()).to_pandas()\n",

"averages['coverage']/=(averages['coverage_right']*(1-averages['duplication_rate']))\n",

"sns.lmplot(data=means[means['cov']>0.05],x='node',y='cov',hue='breed',col='breed',col_order=x_order,col_wrap=3,lowess=True,scatter_kws={'s':20})\n",

"sns.catplot(data=x,kind='point',x='node',y='adjusted coverage',hue='breed',col='breed',col_order=x_order,col_wrap=3)\n",

"\n",

"import statsmodels.api as sm\n",

"lowess = sm.nonparametric.lowess\n",

"from scipy.interpolate import splev, splrep, UnivariateSpline\n",

"\n",

"def map_lowess(data,x,y,color):\n",

" spl = UnivariateSpline(list(data['node']), list(data['cov']),w=np.sqrt(data['length']),s=0)#,s=5e3)\n",

" y2 = spl(data['node'])\n",

" ax = plt.gca()\n",

" ax.plot(data[x],y2)\n",

" \n",

" (averages_r.filter(pl.col('KIT')).groupby(\"breed\")\n",

" .agg(krusk=pl.reduce(kruskalwallis,('adjusted coverage')))\n",

")"

]

}

],

"metadata": {

"kernelspec": {

"display_name": "Python 3 (ipykernel)",

"language": "python",

"name": "python3"

},

"language_info": {

"codemirror_mode": {

"name": "ipython",

"version": 3

},

"file_extension": ".py",

"mimetype": "text/x-python",

"name": "python",

"nbconvert_exporter": "python",

"pygments_lexer": "ipython3",

"version": "3.11.6"

}

},

"nbformat": 4,

"nbformat_minor": 5

}

**PCA.ipynb**

{

"cells": [

{

"cell_type": "code",

"execution_count": null,

"id": "72b35fdf-19d3-4da6-abb7-025a9ef4879d",

"metadata": {},

"outputs": [],

"source": [

"%matplotlib widget\n",

"\n",

"import matplotlib.pyplot as plt\n",

"import seaborn as sns\n",

"import pandas as pd"

]

},

{

"cell_type": "code",

"execution_count": null,

"id": "03d6888b-25f7-4279-acba-ffdee96a8682",

"metadata": {},

"outputs": [],

"source": [

"def plot_PCAs(hues=None):\n",

" expected_white = ['HER','SIM','FV','GWH','MON','NMD','YAR','cross'] + ['cSIM','SxH','FLK','VWD','HWD','sHER','KWH']\n",

" SNPs = pd.read_csv('PCA/control.eigenvec',delimiter='\\t')\n",

" SNPs_var = [float(i.rstrip()) for i in open('PCA/control.eigenval')]\n",

"\n",

" SNPs[SNPs['#IID']!='BSW_5|BSW_6']\n",

" \n",

" breeds = pd.read_csv('20231130/sample_information.ARS.csv',delimiter=' ')\n",

" breeds_map = {row['sample']:row['breed'] for _,row in breeds.iterrows()}\n",

"\n",

" SNPs['breed'] = [breeds_map[I] for I in SNPs['#IID']]\n",

" SNPs['Grouping'] = ['white' if B in expected_white else ('cross' if 'cross' in B else 'colored') for B in SNPs['breed']]\n",

" \n",

" f, axes = plt.subplots(figsize=(8,8))\n",

" sns.scatterplot(data=SNPs,x='PC1',y='PC2',ax=axes,hue='breed',hue_order=hues,style='Grouping',palette='tab20',markers={'white':'o','colored':'X','cross':'P'})\n",

"\n",

" axes.set_title(f'Small variants (Top 10 PCs: {sum(SNPs_var):.1f}%)')\n",

" axes.set_xlabel(f'PC 1 ({SNPs_var[0]:.1f}%)')\n",

" axes.set_ylabel(f'PC 2 ({SNPs_var[4]:.1f}%)')\n",

"\n",

" f.tight_layout()"

]

},

{

"cell_type": "code",

"execution_count": null,

"id": "36d35457-8ee9-4487-aba3-a1a180c99835",

"metadata": {},

"outputs": [],

"source": [

"plot_PCAs()"

]

}

],

"metadata": {

"kernelspec": {

"display_name": "Python 3 (ipykernel)",

"language": "python",

"name": "python3"

},

"language_info": {

"codemirror_mode": {

"name": "ipython",

"version": 3

},

"file_extension": ".py",

"mimetype": "text/x-python",

"name": "python",

"nbconvert_exporter": "python",

"pygments_lexer": "ipython3",

"version": "3.11.6"

}

},

"nbformat": 4,

"nbformat_minor": 5

}

**notes_phylogeny**

copied 6.ga.gz from graphs

run

sbatch -n 1 --cpus-per-task=10 --time=4:00:00 --mem-per-cpu=2048 --wrap="bash mash_sketch.sh"

sbatch -n 1 --cpus-per-task=10 --time=4:00:00 --mem-per-cpu=2048 --wrap="bash mash_dist.sh"

then R script based on Danang's publication steps and code (small changes)

**repeat_structure.ipynb**

require(ggplot2) require(gggenes) plotter <- function(name,var="gene"){ x <- read.delim(paste0(name,".tsv")) ggplot(x, aes(xmin=start, xmax=end, y=molecule, fill=get(var), forward=strand)) scale_y_discrete(limits = c("OBV_1","OBV_2","BSW_7","EVO","RGV","BSW_1","BSW_2","BSW_3","BSW_4","BSW_5","BSW_6","BV_5","BV_6","OBV_3","OBV_4","BV_1","BV_2","BV_3","BV_4","HIG","HER","SIM_2","SIM_3","SIM_1")) + geom_gene_arrow(arrowhead_height = unit(2, "mm"), arrowhead_width = unit(1.25, "mm"),arrow_body_height=unit(1, "mm")) + scale_fill_brewer(palette = "Set3") + theme_genes() + xlim(0,50000) ggsave(paste0(name,".svg"), width = 50, height = 20, units = "cm") } plotter("repeats") plotter("ChIP")

**Scripts**

**CLR_hit_counter.sh**

if [[ $1 == S* ]] ;

then

samtools view -h --reference /PacBio_CLR/${1}.cram 6:69999582-70223136 | samtools fasta | seqtk seq -L 10000 > ${1}.fa

else

samtools view -h --reference /REF_DATA/ARS-UCD1.2_Btau5.0.1Y.fa /PacBio_CLR/${1}.mm2.bam 6:69999582-70223136 | samtools fasta | seqtk seq -L 10000 > ${1}.fa

fi

minimap2 -ax map-pb -r 2k -P --end-bonus 1000 -Y ${1}.fa SxG.repeat.fa | samtools sort --write-index -o ${1}.bam

samtools view -e 'rlen>13000' ${1}.bam | cut -f 3 | sort | uniq -c | sort -k1,1nr | awk -v S=${1} -v L=$(cat ${1}.fa | wc -l) '{++a[$1]} END {for (k in a) {print S,L,k,a[k]}}' > ${1}.count

**find_bad_samples.sh**

grep -Ff <(for i in publicSamples/fastq/*1.fixed.fastq.gz; do echo -n "$i "; zcat $i | head -n 1; done | grep -v ":" | grep -oP "\w+(?=_)") sample_information.csv | awk '{print $1}'

**phylogenetic_tree.R**

setwd("/sotiria/Documents/")

install.packages("ape")

install.packages("tidyverse")

install.packages("phylotools")

#load library

library(ape)

library(tidyr)

library(dplyr)

library(stringr)

#read the distance matrix from the tsv file

datdis <- read.csv("6.dist.tsv", header=FALSE, stringsAsFactors=FALSE, sep="\t")

# Rename the header

colnames(datdis) <- c("anim1","anim2","distr","comp4","comp5")

# Extract the correct assembly name from anim1 and anim2

datdis$anim1c <- str_extract(datdis$anim1, ".*")

datdis$anim2c <- str_extract(datdis$anim2, ".*")

# Make the distance matrix into a wide matrix

datsel <- datdis %>% select(anim1c, anim2c, distr)

datwide <- datsel %>% pivot_wider(names_from = anim2c, values_from = distr)

datmat <- as.matrix(datwide %>% select(-anim1c))

rownames(datmat) <- datwide$anim1c

ref <- "ARS_UCD1.2#0#6"

outgroup <- which.max(datmat[ref,]) %>% names()

print(outgroup)

# Apply neighbor joining

tr <- nj(datmat)

# Visualize the tree

pdf("output.pdf", width=12, height=10)

plot.phylo(root(tr, outgroup=outgroup), cex=2, edge.width=2)

axisPhylo(backward=FALSE, cex.axis=2)

dev.off()

**translate_bed_to_graph.py**

#!/usr/bin/env python3

import bisect

import sys

def translate_bed_to_graph(gfa,bed):

boundaries = [int(line.rstrip().split()[5][5:]) for line in open(gfa,'r') if line[0] == 'S' and 'SR:i:0' in line]

with open(bed,'r') as fin:

for line in fin:

s_coord, e_coord = (int(i) for i in line.rstrip().split()[1:3])

gene = line.rstrip().split()[3]

s_node = bisect.bisect_left(boundaries,s_coord)

s_offset = s_coord - boundaries[s_node-1]

e_node = bisect.bisect_left(boundaries,e_coord)

e_offset = e_coord - boundaries[e_node-1]

if s_node == e_node:

print(f's{s_node}\t{s_offset}\t{e_offset}\t{gene}')

else:

for i in range(s_node,e_node+1):

if i == s_node:

print(f's{s_node}\t{s_offset}\t{boundaries[s_node]-boundaries[s_node-1]}\t{gene}')

elif i != e_node:

print(f's{i}\t{0}\t{boundaries[i]-boundaries[i-1]}\t{gene}')

else:

print(f's{e_node}\t{0}\t{e_offset}\t{gene}')

if len(sys.argv) == 3:

translate_bed_to_graph(*sys.argv[1:3])

else:

print('python translate_bed_to_graph.py <gfa> <bed>\n !! Incorrect arguments !!\nPrints output to stdout')


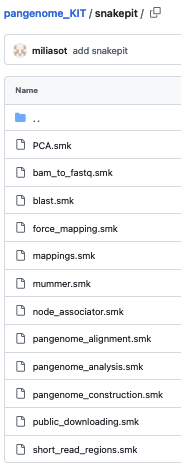


**PCA.smk**

rule DeepVariant:

input:

expand(rules.strobealign.output,sample=samples,allow_missing=True,reference='ARS')

output:

'PCA/{region}.Unrevised.vcf.gz'

params:

samples = '[' + ','.join(samples) + ']',

config = 'config/DV.yaml' #or directly call variants and add here

localrule: True

shell:

'''

#other workflow available from here https://github.com/AnimalGenomicsETH/BSW_analysis/blob/main/snakepit/deepvariant.smk

snakemake -s /snakepit/deepvariant.smk --configfile {params.config} \

--config Run_name="PCA" bam_path="publicSamples/" bam_index=".csi" bam_name="{{sample}}.ARS.bam" model="WGS" samples={params.samples} \

--profile "slurm/fullNT" --nolock {output}

'''

rule plink_PCA:

input:

rules.DeepVariant.output

output:

multiext('PCA/{region}','.prune.in','.eigenval','.eigenvec')

params:

prefix = lambda wildcards, output: PurePath(output[1]).with_suffix('')

threads: 2

resources:

mem_mb = 5000

shell:

'''

plink2 --threads {threads} --vcf {input} --indep-pairwise 100kb 0.8 --maf 0.1 --out {params.prefix} --vcf-half-call m --snps-only --max-alleles 2

plink2 --threads {threads} --vcf {input} --pca --out {params.prefix} --vcf-half-call m --extract {output[0]}

'''

**bam_to_fastq.smk**

def get_files():

targets = []

for samples in config['samples']:

targets.extend(expand('fastq_F/{sample}.chr6.R{id}.fastq.gz',sample=config['samples'], id=["1","2"]))

# print(targets)

return targets

get_files()

rule all:

input:

get_files()

rule samtools_view:

input:

bam = lambda wildcards: config["samples"][wildcards.sample]

output:

out = 'bam/{sample}.chr6.bam'

threads: 2

params: 6

resources:

mem_mb = 2000

shell:

'''

samtools view -b {input.bam} {params} > {output.out}

'''

rule samtools_sort:

input:

bam = lambda wildcards: config["samples"][wildcards.sample],

bam_chr = rules.samtools_view.output

output:

out = 'bam/{sample}.chr6.qsort.bam'

threads: 2

resources:

mem_mb = 2000

shell:

'''

samtools sort -m 30M -@ {threads} -T $TMPDIR -o {output.out} {input.bam_chr} --write-index

'''

rule samtools_fastq:

input:

bam = rules.samtools_sort.output

output:

fq1 = 'fastq_F/{sample}.chr6.R1.fastq.gz',

fq2 = 'fastq_F/{sample}.chr6.R2.fastq.gz'

threads: 2

resources:

mem_mb = 2000

shell:

'samtools fastq --threads {threads} -1 {output.fq1} -2 {output.fq2} -F 0 {input.bam}'

**blast.smk**

def get_files():

targets = []

for samples in config['samples']:

targets.extend(expand('{sample}.{reference}.blastn.out',sample=samples,reference=config['references']))

# print(targets)

return targets

get_files()

rule all:

input:

get_files()

rule run_blast:

input:

ref = lambda wildcards: config["references"][wildcards.reference],

subject = lambda wildcards: config["samples"][wildcards.sample]

output:

out = '{sample}.{reference}.blastn.out'

params: 6

threads: 2

resources:

mem_mb = 2000

shell:

'blastn -query {input.ref} -subject {input.subject} -outfmt {params} -out {output.out}'

**force_mapping.smk**

rule all:

input:

expand('forcing_parameters/{samples}.{presets}.{references}.mm2.bam',**config)#sample=config['samples'],preset=config['presets'],reference=config['references'])

rule minimap2_align:

input:

reference = lambda wildcards: config['references'][wildcards.reference],

sample = lambda wildcards: config['samples'][wildcards.sample]

output:

'forcing_parameters/{sample}.{preset}.{reference}.mm2.bam'

params:

preset = lambda wildcards: config['presets'][wildcards.preset]

threads: 2

resources:

mem_mb = 5000,

disk_scratch = 50

shell:

'''

minimap2 -a {params.preset} -t {threads} {input.reference} {input.sample} | samtools sort - -m 3000M -@ 4 -T $TMPDIR --write-index -o {output}

'''

**mappings.smk**

def get_files():

targets = []

for read_type, samples in config['samples'].items():

targets.extend(expand('{sample}.{reference}.{read_type}.minimap.bam',read_type=read_type,sample=samples,reference=config['references']))

# print(targets)

return targets

get_files()

rule all:

input:

get_files()

presets = {'ONT':'map-ont','HiFi':'map-hifi','CLR':'map-pb','SR_w':'sr','SR':'sr'}

rule map_minimap2:

input:

ref = lambda wildcards: config["references"][wildcards.reference],

fastq = lambda wildcards: config["samples"][wildcards.read][wildcards.sample]

output:

multiext('{sample}.{reference}.{read}.minimap.bam','','.csi')

threads: 12

params:

preset = lambda wildcards: presets[wildcards.read]

resources:

mem_mb = 6000,

walltime = "4:00",

disk_scratch = 50

shell:

'minimap2 -ax {params.preset} -t {threads} {input.ref} {input.fastq} | samtools sort - -m 3000M -@ {threads} -T $TMPDIR -o {output[0]} --write-index'

**mummer.smk**

def get_files():

targets = []

for samples in config['query']:

targets.extend(expand('{sample}_vs_{reference}.mumplot',sample=samples,reference=config['references']))

print(targets)

return targets

get_files()

rule all:

input:

get_files()

rule run_nucmer:

input:

ref = lambda wildcards: config["references"][wildcards.ref],

subject = lambda wildcards: config["query"][wildcards.query]

output:

'{query}_vs_{ref}.delta'

params:

prefix = '{query}_vs_{ref}'

threads: 2

resources:

mem_mb = 2000

shell:

'''

nucmer -p={params.prefix} {input.ref} {input.subject}

samtools faidx {input.ref}

samtools faidx {input.subject}

awk '{{print $1,$2,"+"}}' {input.ref}.fai > {input.ref}.tsv

awk '{{print $1,$2,"+"}}' {input.subject}.fai > {input.subject}.tsv

'''

rule run_mummerplot:

input:

deltafile = rules.run_nucmer.output,

ref = lambda wildcards: config["references"][wildcards.ref],

subject = lambda wildcards: config["query"][wildcards.query]

output:

out = '{query}_vs_{ref}.mumplot'

params:

settings = '-l -f',

prefix = '{query}_vs_{ref}'

threads: 2

resources:

mem_mb = 2000

shell:

'mummerplot {params.settings} -R {input.ref}.tsv -Q {input.subject}.tsv {input.deltafile} -p={params.prefix}'

**node_associator.smk**

rule all:

input:

'association.bed'

import glob

rule mgutils_merge:

input:

glob.glob('/cattle/*.bed')

output:

'association.vcf'

shell:

'''

paste {input} | mgutils.js merge -s <(ls {input} | xargs -L1 -I{{}} basename {{}} .bed) - | mgutils.js merge2vcf | bcftools query -H -f '%INFO/VS %INFO/VE %INFO/AWALK [%GT0 ]\\n' > {output}

'''

from collections import defaultdict

import regex

import numpy as np

import matplotlib.pyplot as plt

arrows = regex.compile('>|<')

def get_allele_nodes(start,end,nodes):

alleles = defaultdict(list)

for i,node in enumerate(nodes.split(',')):

if node == '*':

alleles[i] = [f'{start}-{end}']

else:

for n in arrows.split(node)[1:]:

alleles[i].append(n)

return dict(alleles)

def generate_matrix(fname):

MATRIX = {}

samples = None

for line in open(fname):

if not samples:

samples = [i.split(']')[1].split(':')[0] for i in line.rstrip().split()[4:]]

continue

start, end, nodes, *GTs = line.rstrip().split()

alleles = get_allele_nodes(start,end,nodes)

for i, GT in enumerate(GTs):

if GT == '.':

continue

GT = int(GT)

for node in alleles[int(GT)]:

if node not in MATRIX:

MATRIX[node] = [False]*len(GTs)

MATRIX[node][i] = True

IDs = np.array(list(MATRIX.keys()))

vals = np.array(list(MATRIX.values()))

return samples,IDs,vals

rule generate_assoication_bed:

input:

'association.vcf'

output:

'association.bed'

run:

samples,nodes,matrix = generate_matrix(input[0])

#!! HARDCODED SAMPLE ORDER !!

white_headed = np.array([False, True, False, False, False, False, False, False, False, False, False, False, False, False, False, True, False, True, False])

#!! HARDCODED SAMPLE ORDER !!

_sum = np.isclose(matrix,white_headed,equal_nan=True).sum(axis=1)

cmap = plt.get_cmap('cividis',len(samples))

with open(output[0],'w') as fout:

for i,n in enumerate(nodes):

if '-' in n:

for e in n.split('-')[1:]:

fout.write(f'{e[2:]}\t0\t1000\tX\t{_sum[i]}\t+\t0\t1000\t255,40,77\n')

else:

col = ','.join([f'{255*i:.0f}' for i in cmap(_sum[i]/len(samples))[:3]])

fout.write(f'{n[1:]}\t0\t100000\tX\t{_sum[i]}\t+\t0\t0\t{col}\n')

**pangenome_alignment.smk**

from pathlib import PurePath

wildcard_constraints:

EXT = r'gaf.gz|gam|bam|gaf'

rule samtools_fastq:

input:

bam = rules.strobealign.output,

reference = lambda wildcards: config['references'][wildcards.reference]

output:

'{pangenome}/extractedFastq_{reference}/{sample}.fastq.gz'

params:

region = lambda wildcards: config['graphs'][wildcards.pangenome]['region'][wildcards.reference]

threads: 2

resources:

mem_mb = 2000

shell:

'''

samtools view --reference {input.reference} -@ {threads} -u {input.bam[0]} {params.region} 197bp 6kb | samtools collate -O -@ {threads} -u -T $TMPDIR - | samtools fastq --threads {threads} -f 3 -F 1284 -N -o {output} -s /dev/null

'''

rule vg_autoindex:

input:

gfa = expand(rules.odgi_extract.output,renamed='renamed',allow_missing=True),

fasta = lambda wildcards: expand(rules.panSN_spec.output,chromosome=convert_region_to_chromosome(wildcards))

output:

multiext('{pangenome}/index','.giraffe.gbz','.min','.dist')

params:

prefix = lambda wildcards, output: PurePath(output[1]).with_suffix('')

threads: 4

resources:

mem_mb = 4000

shell:

'''

vg autoindex -t {threads} --workflow giraffe -g {input.gfa} -r <(zcat {input.fasta[0]} | head -n 2) -p {params.prefix}

chmod 444 {output[2]}

'''

rule vg_giraffe:

input:

indexed = rules.vg_autoindex.output,

reads = rules.samtools_fastq.output

output:

'{pangenome}/{sample}.{reference}.giraffe.gaf'

threads: 4

resources:

mem_mb = 1500,

walltime = '4h'

shell:

'''

vg giraffe -t {threads} -Z {input.indexed[0]} -m {input.indexed[1]} -d {input.indexed[2]} --named-coordinates -o gaf --interleaved -f {input.reads} > {output}

'''

rule gafpack_count:

input:

gfa = expand(rules.odgi_extract.output,renamed='renamed',allow_missing=True),

gaf = rules.vg_giraffe.output[0]

output:

'{pangenome}/{sample}.{reference}.giraffe.count'

resources:

walltime = '30m'

shell:

'''

gafpack -g {input.gfa} -a {input.gaf} -l -c | awk '!/#/ {{print "{wildcards.sample}",$1,$2}}' > {output}

'''

rule make_node_coverage_csv:

input:

expand(rules.gafpack_count.output,sample=samples,allow_missing=True)

output:

'{pangenome}/node_coverage.{reference}.csv.gz'

localrule: True

shell:

'''

{{ echo "sample node coverage" ; cat {input} ; }} | pigz -p 2 -c > {output}

'''

**pangenome_analysis.smk**

import subprocess

def rename_region(pangenome,fasta,just_name=False):

if just_name:

chromosome = pangenome

elif pangenome in config['graphs']:

region = config['graphs'][pangenome]['region']

chromosome = region['ARS'].split(':')[0]

elif pangenome in config['gggenes']:

region = config['gggenes'][pangenome]['region']

chromosome = region['ARS'].split(':')[0]

try:

panSN = subprocess.check_output(f"zcat {fasta} | head -n 1 | sed 's/>//'",shell=True,encoding="utf-8",stderr=subprocess.STDOUT).strip()

except subprocess.CalledProcessError:

return '' #file doesn't exist yet, but will when we need this

if 'gzip' in panSN:

return '<TBD>' # panSN doesn't really exist yet

if just_name:

return panSN

return region['ARS'].replace(chromosome,panSN,1)

def convert_region_to_chromosome(wildcards):

key = 'gggenes' if wildcards.pangenome in config['gggenes'] else 'graphs'

return config[key][wildcards.pangenome]['region']['ARS'].split(':')[0]

rule odgi_extract:

input:

og = lambda wildcards: expand(rules.pggb_construct.output['og'],chromosome=convert_region_to_chromosome(wildcards)),

fasta = lambda wildcards: expand(rules.panSN_spec.output[0],chromosome=convert_region_to_chromosome(wildcards))

output:

'{pangenome}/pggb.subgraph.{renamed}.gfa'

params:

region = lambda wildcards, input: rename_region(wildcards.pangenome,input.fasta),

rename = lambda wildcards: "sed 's/:[0-9]\+-[0-9]\+//'" if wildcards.renamed == 'renamed' else "cat"

threads: 2

resources:

mem_mb = 2500

shell:

'''

odgi extract -t {threads} -i {input.og} -r "{params.region}" -o /dev/stdout |\

odgi sort -t {threads} -p "wc" -i - -o - |\

odgi view -t {threads} -i - -g |\

{params.rename} > {output}

'''

rule node_sizes:

input:

expand(rules.odgi_extract.output,renamed='renamed',allow_missing=True)

output:

'{pangenome}/subgraph.nodes.csv'

localrule: True

shell:

'''

awk '$1=="S" {{print $2,length($3)}}' {input} > {output}

'''

rule odgi_sort:

input:

og = rules.pggb_construct.output['og']

output:

gfa = 'graphs/{chromosome}.pggb.sorted.gfa',

og = 'graphs/{chromosome}.pggb.sorted.og'

threads: 1

resources:

mem_mb = 20000

shell:

'''

odgi sort -t {threads} -i {input} -p "wc" -o /dev/stdout | tee {output.og} | odgi view -i - -g > {output.gfa}

'''

rule find_bubbles:

input:

rules.odgi_sort.output['gfa']

output:

'graphs/{chromosome}.graph_bubbles.list'

resources:

mem_mb = 35000

shell:

'''

gfatk SSC --size 5 {input} | sort -k1,1n | sed 's/^0/1/' > {output}

'''

rule jaccard_index:

input:

graph = rules.odgi_sort.output['og'],

bubbles = rules.find_bubbles.output,

fasta = rules.panSN_spec.output[0]

output:

'graphs/{chromosome}.graph_bubbles.jaccard.gz'

params:

reference_name = lambda wildcards, input: rename_region(wildcards.chromosome,input.fasta,True),

graph = lambda wildcards, input: Path(input.graph).resolve(),

_output = lambda wildcards, output: Path(output[0]).resolve(),

padding = 1000

threads: 8

resources:

mem_mb = 2500

shell:

'''

set +e #some similarities still segfault, but we can ignore them

echo "path sample1 sample2 jaccard" | pigz > {output}

odgi position -t {threads} -i {input.graph} -r {params.reference_name} -G <(cat {input.bubbles} | tr ' ' '\\n') | awk -F',' 'NR>1 {{print $1,$4}}' |\

awk 'FNR==NR {{ a[$1] = $2; next }} {{ print a[$1],a[$2]}}' - {input.bubbles} | awk 'NF==2&&!/NA/' |\

awk -v OFS='\\t' '$1>0&&$2>0&&$2>$1 {{print "{params.reference_name}",$1-{params.padding},$2+{params.padding};next}} {{print R,$2-{params.padding},$1+{params.padding} }}' | awk -v prev1=0 -v prev2=0 -v OFS='\\t' '$2>0&&$3>0&&$3>$2&&$3>prev2&&prev2!=0 {{print $1,prev1,prev2}} {{prev1=$2;prev2=$3}}' > $TMPDIR/positions.bed

cd $TMPDIR

odgi extract -t {threads} -i {params.graph} -b $TMPDIR/positions.bed -E -d 10000 -s

for g in *.og

do

odgi similarity -t {threads} -i $g | sed 's/:[0-9]\+-[0-9]\+//g' | awk -v S=${{g}} 'NR>1 && $2>$1 {{print S,$1,$2,$6}}'

done | pigz -p {threads} >> {params._output}

'''

checkpoint bedtools_makewindows:

input:

fai = 'graphs/{chromosome}.fa.gz.fai',

output:

directory('graphs/{chromosome}_windows_{size,\d+}')

params:

reference_path = 'ARS_UCD1.2#0#{chromosome}',

split_every = 1000

localrule: True

shell:

'''

mkdir -p {output}

bedtools makewindows -w {wildcards.size} -g <(echo -e "{params.reference_path}\\t"$(awk '$1=="{params.reference_path}" {{print $2}}' {input.fai})) |\

split --lines {params.split_every} -a 4 --additional-suffix .bed -d - {output}/

'''

rule odgi_extract_windows:

input:

og = rules.pggb_construct.output['og'],

bed = 'graphs/{chromosome}_windows_{size}/{window}.bed'

output:

'graphs/{chromosome}_windows_{size}/{window}.jaccard.gz'

params:

og = lambda wildcards, input: Path(input['og']).resolve(),

bed = lambda wildcards, input: Path(input['bed']).resolve(),

_output = lambda wildcards, output: Path(output[0]).resolve()

threads: 6

resources:

mem_mb = 6000,

walltime = '4h'

shell:

'''

cd $TMPDIR

odgi extract -i {params.og} -b {params.bed} -t {threads} -s

for g in *.og

do

odgi similarity -t {threads} -i $g | sed 's/:[0-9]\+-[0-9]\+//g' | awk -v S=${{g}} 'NR>1 && $2>$1 {{print S,$1,$2,$6}}'

done | pigz -p {threads} > {params._output}

'''

def aggregate_windows(wildcards):

checkpoint_output = checkpoints.bedtools_makewindows.get(**wildcards).output[0]

return expand('graphs/{{chromosome}}_windows_{{size}}/{window}.jaccard.gz', window=glob_wildcards(PurePath(checkpoint_output).joinpath('{window}.bed')).window)

rule gather:

input:

aggregate_windows

output:

'graphs/{chromosome}.windows.{size}.jaccard.gz'

localrule: True

shell:

'''

echo "path sample1 sample2 jaccard" | pigz > {output}

cat {input} >> {output}

'''

rule summarise_jaccard:

input:

rules.gather.output

output:

'graphs/{chromosome}.summary.{size}.jaccard.csv'

params:

min_paths = 153

threads: 4

resources:

mem_mb = 5000,

walltime = '10m'

run:

import polars as pl

df = (pl.read_csv(input[0],separator=' ',dtypes=[pl.Utf8,pl.Utf8,pl.Utf8,pl.Float32])

.with_columns([pl.lit(wildcards.chromosome).alias('Chromosome'),pl.col("path").str.extract(r":(\d+)-").cast(pl.UInt32, strict=False).alias('Start')])

.drop('path')

)

sample_classes = {"white":[f'{S}#{wildcards.chromosome}' for S in ('SIM_2','HER','SIM_3','SIM_1')],

"colored":[f'{S}#{wildcards.chromosome}' for S in ["BSW_1","BSW_2","BSW_3","EVO","RGV",

"BSW_4","BSW_5","BSW_6","BSW_7","OBV_1",

"OBV_2","OBV_3","OBV_4","BV_1","BV_2",

"BV_3","BV_4","BV_5","BV_6","HIG"]]}

invert_samples = {v:K for K,samples in sample_classes.items() for v in samples}

df = df.with_columns([(pl.col('sample1').replace(invert_samples)==pl.col('sample2').replace(invert_samples)).alias('grouping')]).drop(['sample1','sample2'])

(df.group_by(['Chromosome','Start','grouping'])

.agg(pl.col('jaccard').mean())

.join(df.group_by(['Chromosome','Start']).agg(pl.count()),on=['Chromosome','Start'])

.filter(pl.col('count')>=params.min_paths)

.pivot(index=['Chromosome','Start','count'],columns='grouping',values='jaccard')

.with_columns([(pl.col('true')/pl.col('false')).alias('Jaccard similarity ratio')])

.drop(['true','false'])

.write_csv(output[0]))

rule odgi_procbed:

input:

graph = lambda wildcards: expand(rules.odgi_extract.output,pangenome=wildcards.region,renamed='raw'),

bed = lambda wildcards: config['gggenes'][wildcards.region]['repeats']

output:

repeats = 'gggenes/{region}.bed',

og = 'gggenes/{region}.og'

params:

chromosome = lambda wildcards: config['gggenes'][wildcards.region]['region']['ARS'].split(':')[0],

path = lambda wildcards: PurePath(config['gggenes'][wildcards.region]['repeats']).with_suffix('').with_suffix('').name

localrule: True

shell:

'''

awk -v OFS='\\t' '$1=={params.chromosome} {{print "{params.path}#{params.chromosome}",$2,$3,$4"_"NR,$6,$5,$7,$8}}' {input.bed} | grep -vE "(Simple_repeat|Low_complexity)" | sort -k 1,1V -k2,2n | tee {output.repeats} |

odgi procbed -i {input.graph} -b /dev/stdin |\

odgi inject -i {input.graph} -b /dev/stdin -o {output.og}

'''

rule odgi_untangle:

input:

bed = rules.odgi_procbed.output['repeats'],

og = rules.odgi_procbed.output['og']

output:

'gggenes/{region}.tangle',

'gggenes/{region}.repeats.tsv'

params:

jaccard = config['gggenes'].get('jaccard',0.5)

localrule: True

shell:

'''

odgi untangle -j {params.jaccard} -R <(odgi paths -i {input.og} -L | grep -v "#") -i {input.og} -g | tee {output[0]} |\

grep -E $(odgi paths -i {input.og} -L | awk 'BEGIN {{printf "^mol|"}} /#/ {{printf $1"|"}}' | sed 's/|$//') |\

awk -v OFS='\\t' 'BEGIN {{b["gene"]="repeat_class"; c["gene"]="repeat_family"}} NR==FNR {{a[$4]=$5; b[$4]=$7; c[$4]=$8; next}} {{if (a[$2]=="-") {{$5=0}}; print $1,$2,b[$2],c[$2],$3,$4,$5 }}' {input.bed} - |\

sed -E 's/_[0-9]+//' |\

sed -E 's/#[0-9]+:[0-9]+-[0-9]+//' > {output[1]}

'''

**pangenome_construction.smk**

def get_all_samples():

return list(filter(None,[asm for sample,asms in config['assemblies'].items() for asm in asms if asm !='~']))

def panSN_naming():

mapping = []

for n, (sample_ID, sample_assemblies) in enumerate(config['assemblies'].items()):

for haplotype, path in enumerate(sample_assemblies,len(sample_assemblies)!=1):

if n == 0: #is reference

mapping.append(f'"{sample_ID}#{haplotype}# {path}"')

elif path: #is generic/haplotype, #NOTE this is still unclear on vg path metadata model, as potentially needs a further #phaseblock after the chromosome, which we can't prefix here

mapping.append(f'"{sample_ID}#{haplotype}# {path}"')

return mapping

localrules: pangenome_tree

rule panSN_spec:

input:

lambda wildcards: get_all_samples()

output:

multiext('graphs/{chromosome}.fa.gz','','.fai','.gzi')

params:

mapping = lambda wildcards: panSN_naming()

threads: 4

resources:

mem_mb = 1500,

walltime = '30m'

shell:

'''

for i in {params.mapping}

do

set -- $i

samtools faidx --length 0 $2 {wildcards.chromosome} | fastix -p $1 -

done | bgzip -@ {threads} -c > {output[0]}

samtools faidx {output[0]}

'''

rule mash_triangle:

input:

rules.panSN_spec.output[0]

output:

'graphs/{chromosome}.mash'

threads: 4

resources:

mem_mb = 1000,

walltime = '1h'

shell:

'''

mash triangle -s 10000 -k 25 -p {threads} -i {input} | awk 'NR>1' > {output}

'''

rule mash_sketch:

input:

lambda wildcards: config['assemblies'][wildcards.sample][max(int(wildcards.haplotype)-1,0)]

output:

'graphs/{sample}.{haplotype}.msh'

threads: 4

resources:

mem_mb = 1500

shell:

'''

samtools faidx {input} {{1..29}} | mash sketch -s 10000 -k 25 -p {threads} -I {wildcards.sample}.{wildcards.haplotype} -o {output} -

'''

def find_assembly_haplotypes():

panSN = panSN_naming()

samples, haplotypes = [], []

for i in panSN:

sample, haplotype, *_ = i.split('#')

samples.append(sample[1:])

haplotypes.append(int(haplotype))

return {'sample':samples,'haplotype':haplotypes}

rule mash_big_triangle:

input:

expand(rules.mash_sketch.output,zip,**find_assembly_haplotypes())

output:

'mash.big_triangle'

localrule: True

shell:

'''

mash triangle -s 10000 -k 25 {input} | tail -n +2 > {output}

'''

import numpy as np

def read_mash_triangle(mash_triangle,estimate_divegence=False):

names, vals = [], []

with open(mash_triangle,'r') as fin:

for i,line in enumerate(fin):

parts = line.rstrip().split()

names.append(parts[0])

vals.append(parts[1:]+[0])

Q = np.asarray([np.pad(a, (0, len(vals) - len(a)), 'constant', constant_values=0) for a in vals],dtype=float)

if estimate_divegence:

return round((1-Q.max()*2.5)*100,1) #adjust max divergence by 2.5x factor

return names, (Q+Q.T)

rule pangenome_tree:

input:

mash = rules.mash_triangle.output

output:

'graphs/{chromosome}.tree.svg'

# localrule: True

run:

from scipy.spatial.distance import squareform

from scipy.cluster import hierarchy

import matplotlib.pyplot as plt

names, dists = read_mash_triangle(input.mash[0])

Z = hierarchy.linkage(squareform(dists),method='average',optimal_ordering=True)

f, ax = plt.subplots()

dn = hierarchy.dendrogram(Z,labels=names,orientation='left',get_leaves=True,ax=ax)

f.savefig(output[0])

#Do we want to implement split_approx_mappings_in_chunks.py?

#implemented in nfcore-pangenome

rule pggb_construct:

input:

fasta = rules.panSN_spec.output,

mash = rules.mash_triangle.output

output:

gfa = 'graphs/{chromosome}.pggb.gfa',

og = 'graphs/{chromosome}.pggb.og'

threads: 12

resources:

mem_mb = 3500,

walltime = '24h',

scratch = '50G'

params:

_dir = lambda wildcards, output: Path(output[0]).parent,

divergence = lambda wildcards, input: read_mash_triangle(input.mash[0],True),

n_haplotypes = lambda wildcards: len(get_all_samples()),

min_match = 31, #adjusted from HPRC pipeline

segment_length = 75000

shell:

'''

pggb -i {input.fasta[0]} -t {threads} \

-s {params.segment_length} -p {params.divergence} -n {params.n_haplotypes} \

-k {params.min_match} \

--skip-viz --temp-dir $TMPDIR \

-o {params._dir}

mv {params._dir}/{wildcards.chromosome}.*.smooth.final.gfa {output.gfa}

mv {params._dir}/{wildcards.chromosome}.*.smooth.final.og {output.og}

'''

**public_downloading.smk**

from pathlib import PurePath

rule fastq_dl:

output:

temp(expand('publicSamples/fastq/{accession}_R{N}.fastq.gz', N=(1,2), allow_missing=True)),

params:

_dir = lambda wildcards, output: PurePath(output[0]).parent

threads: 1

resources:

mem_mb = 5000,

proxy_load = 1

envmodules:

'eth_proxy'

conda: 'fastq-dl'

shell:

'''

fastq-dl --accession {wildcards.accession} --cpus {threads} --silent --outdir {params._dir} --prefix {wildcards.accession} --group-by-sample && [[ -s {output[0]} ]] && [[ -s {output[1]} ]]

'''

rule fastq_dl_fixed:

input:

fastq = 'publicSamples/fastq/{accession}_R{N}.fastq.gz'

output:

temp('publicSamples/fastq/{accession}_R{N}.fixed.fastq.gz')

threads: 4

resources:

mem_mb = 1500

shell:

'''

pigz -dc -p {threads} {input.fastq} | awk '{{print (NR%4==1 && NF>1) ? "@"$2 : $0}}' | pigz -c -p {threads} > {output}

'''

rule fastp_filter:

input:

lambda wildcards: expand(rules.fastq_dl_fixed.output,accession=SRA_samples[wildcards.sample],N=(1,2),allow_missing=True) if wildcards.sample in SRA_samples else expand(config['local_bams']+'{{sample}}_R{N}.fastq.gz',N=(1,2))

output:

fastq = temp(expand('publicSamples/fastq/{sample}.R{N}.fastq.gz',N=(1,2),allow_missing=True))

params:

min_quality = config.get('fastp',{}).get('min_quality',15),

unqualified = config.get('fastp',{}).get('unqualified',40),

min_length = config.get('fastp',{}).get('min_length',15)

threads: 4

resources:

mem_mb = 2500

shell:

'''

fastp -q {params.min_quality} -u {params.unqualified} -g --length_required {params.min_length} --thread {threads} -i {input[0]} -o {output.fastq[0]} -I {input[1]} -O {output.fastq[1]} --json /dev/null --html /dev/null

'''

## We don't index the reference, because it depends on read size which is variable. Do it on the fly

rule strobealign:

input:

fastq = expand(rules.fastp_filter.output,allow_missing=True),

reference = lambda wildcards: config['references'][wildcards.reference]

output:

bam = temp(multiext('publicSamples/{sample}.{reference}.cram','','.crai')),

dedup_stats = 'publicSamples/{sample}.{reference}.dedup.stats'

params:

rg = '"@RG\\tID:{sample}\\tCN:UNK\\tLB:{sample}\\tPL:illumina\\tSM:{sample}"',

threads: 16

resources:

mem_mb = 2000,

scratch = '50g',

walltime = '4h'

shell:

'''

strobealign {input.reference} {input.fastq} -t {threads} --rg-id {wildcards.sample} |\

samtools collate -u -O -@ {threads} - |\

samtools fixmate -m -u -@ {threads} - - |\

samtools sort -T $TMPDIR -u -@ {threads} |\

samtools markdup -T $TMPDIR -S -@ {threads} --write-index -f {output.dedup_stats} --reference {input.reference} --output-fmt-option version=3.1 - {output.bam[0]}

'''

rule samtools_stats:

input:

rules.strobealign.output['bam']

output:

'coverage/{sample}.{reference}.cram.stats'

threads: 2

resources:

mem_mb = 1500

shell:

'''

samtools stats -d -f 3 -F 1284 --threads {threads} {input[0]} {{1..29}} > {output[0]}

'''

#hardcoded filenames in the awk loop

rule make_fancy_csv:

input:

csv = config['samples'],

stats = expand(rules.samtools_stats.output,sample=samples,allow_missing=True),

dedup = expand(rules.strobealign.output['dedup_stats'],sample=samples,allow_missing=True)

output:

'sample_information.{reference}.csv'

localrule: True

shell:

'''

echo "sample ID breed coverage read_length duplication_rate" > {output}

while read -r a b c d

do

if [[ ${{a::1}} == "#" ]] ; then

continue

fi

echo "$a $b $c $(awk '/total length/ {{ print $4/2489385779 }}' coverage/$a.{wildcards.reference}.cram.stats) $(awk '$1=="RL" {{L+=($2*$3);n+=$3}} END {{printf L/n}}' coverage/$a.{wildcards.reference}.cram.stats) $(awk '$1=="PAIRED:" {{P=$2}} {{if ($1=="DUPLICATE"&&$2=="PAIR:") {{ D=$3 }} }} END {{print D/P}}' publicSamples/$a.{wildcards.reference}.dedup.stats)"

done < {input.csv} >> {output}

'''

**short_read_regions.smk**

rule all:

input:

expand('bam_slices/{region}.coverage.Q{Q}.tsv',region=config['regions'],Q=config.get('Q',10))

rule samtools_view:

input:

'{sample}.bam'

output:

'bam_slices/{sample}.{region}.bam'

threads: 2

resources:

mem_mb = 3000,

walltime = '30'

params:

region = '6:70063972-70155205' #lambda wildcards: config['regions'][wildcards.region]

shell:

'''

samtools view --threads {threads} --write-index -o {output} {input} {params.region}

'''

rule samtools_bedcov:

input:

bams = expand('{sample}.bam',sample=config['samples']),

bed = 'bam_slices/{region}.bed'

output:

'bam_slices/{region}.coverage.Q{Q}.tsv'

params:

breeds = '\\n'.join(['ID\\tbreeds'] + [f'{K}\\t{V}' for K,V in config['samples'].items()])

threads: 1

resources:

mem_mb = 25000

shell:

'''

paste <(echo -e "{params.breeds}") <(samtools bedcov -Q {wildcards.Q} {input.bed} {input.bams} |\

cut -f 4- |\

awk '{{for(i=1;i<=NF;i++)a[i][NR]=$i}}END{{for(i in a)for(j in a[i])printf"%s"(j==NR?RS:FS),a[i][j]}}' |\

tr ' ' '\\t') > {output}

'''
